# Supplementary material for: Identification of Novel Genetic Determinants of Erythrocyte Membrane Fatty Acid Composition among Greenlanders
Source: PubMed Central journal article supplement (PMC4920407; doi:10.1371/journal.pgen.1006119), 2016-06-24

**S6 Fig. Association and conditional plots.** Unconditional and conditional association analyses for A) rs2913968 and B) rs11881630 in the *CERS4* locus with arachidic acid (20:0). The association results of the unconditional analysis are colored according to the LD, which is calculated for the candidate SNP in the region. Green dots represent the results of the conditional analysis, and the circles denote the SNPs conditioned on. The p-values are based on imputation data.

A

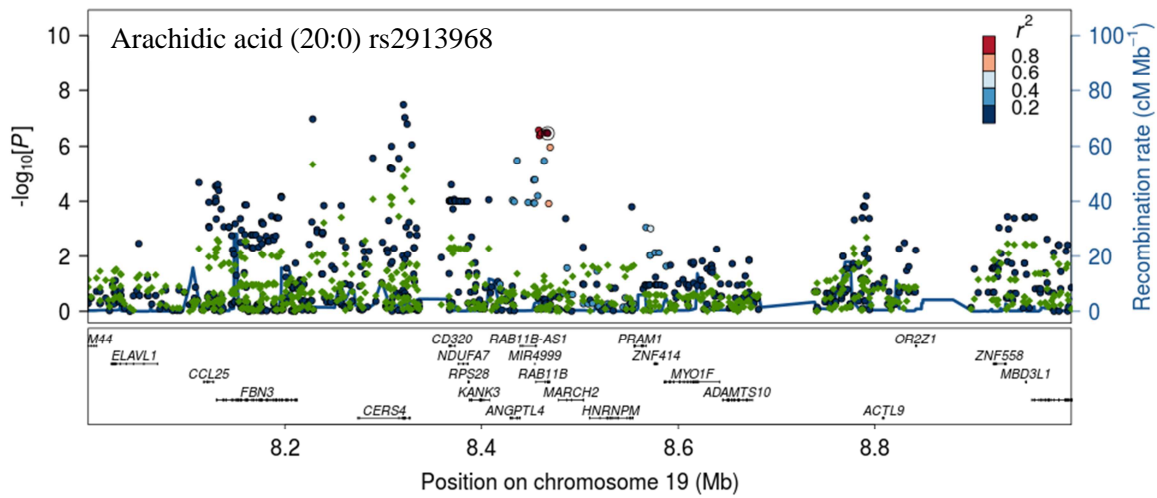

B

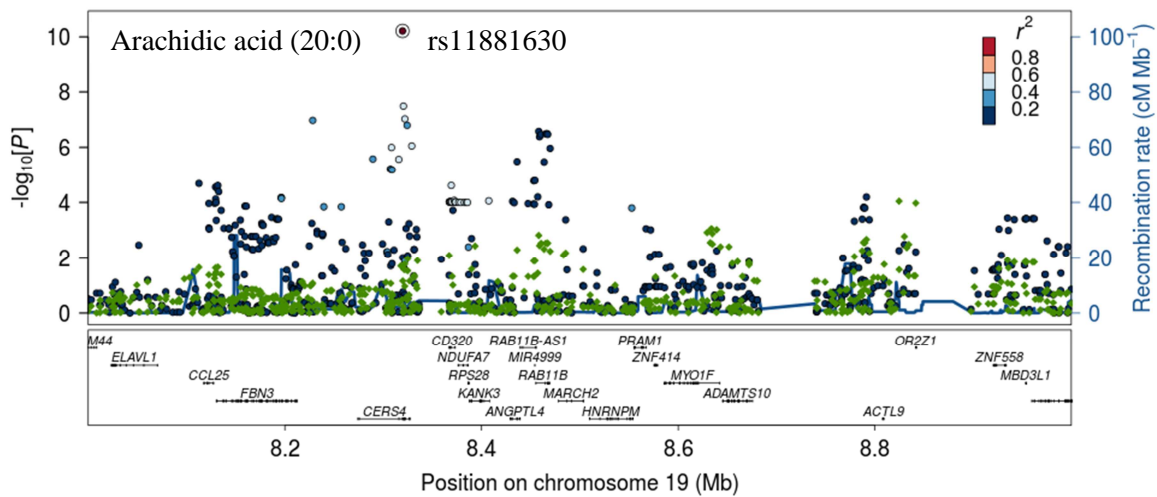

Supplement: pgen.1006119.s006.pdf [file pgen.1006119.s006.pdf]
