# Supplementary material for: Identification of Novel Genetic Determinants of Erythrocyte Membrane Fatty Acid Composition among Greenlanders
Source: PLOS journal article supplement (doi:10.1371/journal.pgen.1006119), 2016-06-24

## S2 Fig. Flow chart of the study.

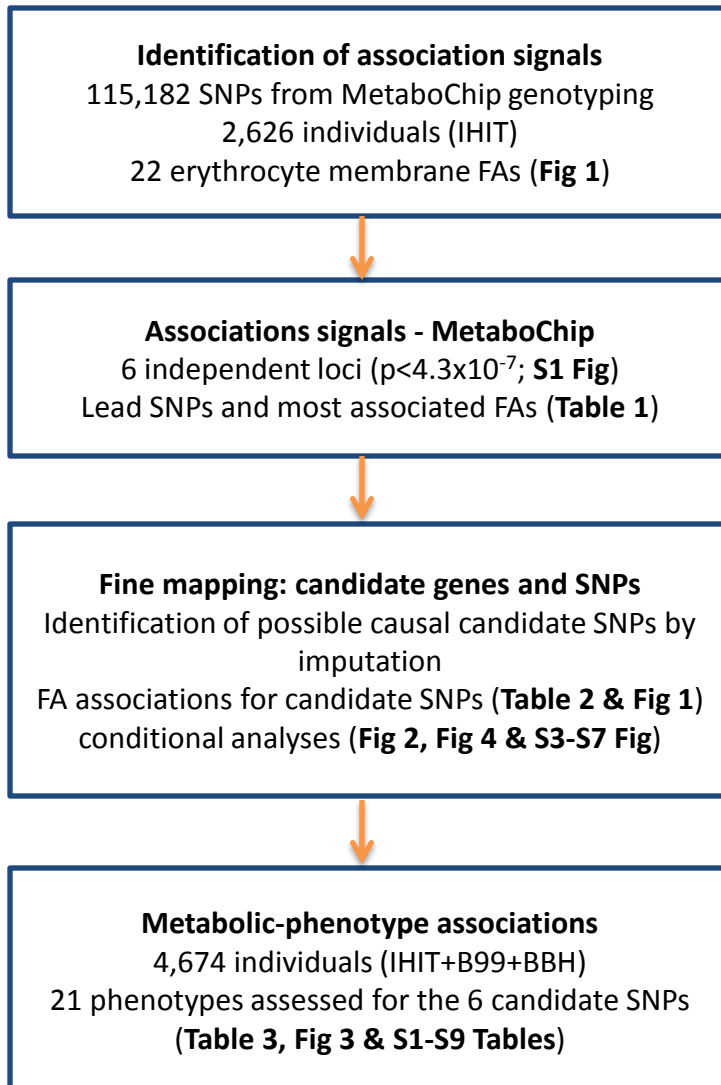

Supplement: S2 (10.1371/journal.pgen.1006119.s002) [file journal.pgen.1006119.s002]
