# Supplementary material for: Identification of Novel Genetic Determinants of Erythrocyte Membrane Fatty Acid Composition among Greenlanders
Source: PLoS Genet. 2016 Jun 24;12(6):e1006119. doi: 10.1371/journal.pgen.1006119 (PMC4920407; doi:10.1371/journal.pgen.1006119)
Supplement: S7 Table — (XLSX) [file pgen.1006119.s014.xlsx]

## Sheet: S7 Table
S7 Table. Association results for rs2913968 (RAB11B)
Trait	Betaa	SEa	p-value	Betab	SEb	p-value (no diet adjustment)	p-value (adjusted for lipid-lowering drugs)
BMI (kg/m2)	-0.022	0.022	0.326	-0.065	0.112
Palmitic acid (16:0)	0.035	0.028	0.218	0.146	0.071	0.212866	0.222341
Palmitoleic acid (16:1 ω-7)	-0.006	0.027	0.824	-0.004	0.01	0.899723	0.956685
Stearic acid (18:0)	0.064	0.028	0.0204	0.068	0.033	0.0314352	0.0483601
Oleic acid (18:1 ω-9)	0.009	0.029	0.755	0.026	0.052	0.879052	0.901417
Linoleic acid (cis-cis-18:2 ω-6)	-0.032	0.023	0.168	-0.076	0.054	0.0818146	0.177075
Alpha-linolenic acid (18:3 ω-3)	-0.005	0.014	0.714	-0.002	0.003	0.616861	0.71858
Gamma-linolenic acid (18:3 ω-6 )	0.002	0.007	0.788	0.001	0.001	0.887357	0.8644
Stearidonic acid (18:4 ω-3)	0.026	0.013	0.0385	0.01	0.004	0.0400962	0.02123
Arachidic acid (20:0)	0.144	0.028	2.74e-07	0.019	0.004	7.2e-07	1.07e-06
11-eicosenoic acid (20:1 ω-9)	0.02	0.024	0.395	0	0.005	0.212252	0.171879
Dihomo-gamma-linolenic acid (20:3 ω-6)	-0.04	0.023	0.0876	-0.019	0.013	0.0424423	0.0846755
Eicosatetraenoic acid (20:4 ω-3)	-0.023	0.011	0.0414	-0.005	0.003	0.0609229	0.0492872
Arachidonic acid (20:4 ω-6)	-0.038	0.026	0.144	-0.106	0.066	0.106559	0.107676
Eicosapentaenoic acid (20:5 ω-3)	-0.025	0.022	0.268	-0.034	0.038	0.550413	0.74797
Behenic acid (22:0)	0.073	0.025	0.00399	0.036	0.012	0.0156994	0.0366835
Erucic acid (22:1 ω-9)	0.006	0.011	0.602	0.001	0.003	0.525305	0.46473
Adrenic acid (22:4 ω-6)	-0.035	0.024	0.137	-0.007	0.011	0.0793026	0.0870578
Docosapentaenoic acid (22:5 ω-3)	-0.034	0.027	0.218	-0.026	0.019	0.323796	0.360799
Docosapentaenoic acid (22:5 ω-6)	-0.029	0.013	0.0307	-0.01	0.006	0.0212236	0.0306516
Docosahexaenoic acid (22:6 ω-3)	-0.056	0.026	0.0343	-0.121	0.057	0.0798208	0.115667
Lignoceric acid (24:0)	0.026	0.026	0.309	0.038	0.025	0.472065	0.663891
Nervonic acid (24:1 ω-9)	0.045	0.025	0.078	0.06	0.036	0.0352228	0.0604437
Cholesterol (mmol/l)	-0.031	0.021	0.145	-0.039	0.025
Serum C-peptide (fastende) (pmol/l)	-0.004	0.023	0.878	-0.176	7.533
Serum C-peptide (120 minutes OGTT) (pmol/l)	-0.007	0.023	0.748	-18.658	25.714
Fat percent (%)	-0.026	0.027	0.33	-0.15	0.235
HbA1c (%)	-0.015	0.018	0.389	-0.013	0.01
HDL-cholesterol (mmol/l)	0.043	0.021	0.0437	0.02	0.011
Height (cm)	-0.007	0.018	0.702	-0.052	0.133
Hip (cm)	-0.006	0.022	0.77	-0.058	0.209
HOMA-IR	-0.003	0.025	0.896	0	0.034
Serum insulin (fasting) (pmol/l)	0.001	0.025	0.972	0.084	1.007
Serum insulin (120 minutes OGTT) (pmol/l)	-0.007	0.025	0.777	-2.081	5.706
LDL-cholesterol (mmol/l)	-0.046	0.023	0.0475	-0.053	0.026
Lean mass (kg)	-0.031	0.025	0.222	-0.21	0.163
Plasma glucose (fasting) (mmol/l)	-0.012	0.023	0.597	-0.024	0.022
Plasma glucose (120 minutes OGTT) (mmol/l)	-0.011	0.024	0.644	-0.062	0.06
Type 2 diabetes (case/control)	-0.006	0.008	0.474	-0.006	0.008
Triglycerides (mmol/l)	-0.047	0.024	0.0465	-0.039	0.017
Waist (cm)	-0.021	0.021	0.321	-0.216	0.287
Weight (kg)	-0.018	0.022	0.398	-0.186	0.319
Waist-hip-ratio	-0.029	0.02	0.152	-0.002	0.002
atransformed effect sizes and standard errors,buntransformed effect sizes and standard errors
