# Supplementary material for: Identification of Novel Genetic Determinants of Erythrocyte Membrane Fatty Acid Composition among Greenlanders
Source: PLoS Genet. 2016 Jun 24;12(6):e1006119. doi: 10.1371/journal.pgen.1006119 (PMC4920407; doi:10.1371/journal.pgen.1006119)
Supplement: S10 Table — (XLSX) [file pgen.1006119.s017.xlsx]

## Sheet: S10 Table
S10 Table. Information about SNPs of interest
SNP	Gene	Chr	Position	Minor allele	Major allele	Chimp allele	Derived allele	MAF	DAF	Flip effect	Analysis source	UCSC link
rs251015	ACSL6	5	131029683	T	C	T	C	0.308	0.692	-1	Metabo (a)	https://genome.ucsc.edu/cgi-bin/hgc?hgsid=451135671_PqWRgEqumcDl3A0YCBaworVsKapd&c=chr5&o=131029682&t=131029683&g=snp142&i=rs251015
rs76430747	ACSL6	5	131346572	T	C	C	T	0.18	0.18	1	Extra geno (b)	https://genome.ucsc.edu/cgi-bin/hgc?hgsid=451119593_haY2X3Ck2WoavfCIOWgEjnsWMrWc&c=chr5&o=131346571&t=131346572&g=snp142&i=rs76430747
rs174570	FADS2	11	61597212	C	T	C	T	0.217	0.783	-1	Metabo (a)	https://genome.ucsc.edu/cgi-bin/hgc?hgsid=451135671_PqWRgEqumcDl3A0YCBaworVsKapd&c=chr11&o=61597211&t=61597212&g=snp142Common&i=rs174570
rs1551304	CPT1A	11	68876587	T	C	C	T	0.18	0.18	1	Metabo (a)	https://genome.ucsc.edu/cgi-bin/hgc?hgsid=451135671_PqWRgEqumcDl3A0YCBaworVsKapd&c=chr11&o=68876586&t=68876587&g=snp142&i=rs1551304
rs80356779	CPT1A	11	68548130	C	T	C	T	0.271	0.729	-1	Extra geno (b)	https://genome.ucsc.edu/cgi-bin/hgc?hgsid=451120443_pboWbBgdrB8LEzbnJ8nBUP24rGDa&c=chr11&o=68548129&t=68548130&g=snp142Flagged&i=rs80356779
rs2110073	LPCAT3	12	7075882	T	C	T	C	0.128	0.872	-1	Metabo (a)	https://genome.ucsc.edu/cgi-bin/hgc?hgsid=451135671_PqWRgEqumcDl3A0YCBaworVsKapd&c=chr12&o=7075881&t=7075882&g=snp142&i=rs2110073
rs2913968	CERS4	19	8467235	C	T	C	T	0.43	0.57	-1	Metabo (a)	https://genome.ucsc.edu/cgi-bin/hgc?hgsid=451135671_PqWRgEqumcDl3A0YCBaworVsKapd&c=chr19&o=8467234&t=8467235&g=snp142&i=rs2913968
rs11881630	CERS4	19	8319455	T	C	C	T	0.2	0.2	1	Extra geno (b)	https://genome.ucsc.edu/cgi-bin/hgc?hgsid=444665759_4ReAZUZFwbbhKPaNwVLNzIAwtlqZ&c=chr19&o=8319454&t=8319455&g=snp142&i=rs11881630
rs6035106	DTD1	20	18690104	T	C	T	C	0.423	0.577	-1	Metabo (a)	https://genome.ucsc.edu/cgi-bin/hgc?hgsid=448269858_tu2iZheyQlGP0FLYGBftnAjztvbQ&c=chr20&o=18645032&t=18645033&g=snp142&i=rs4813338
Chr, chromosome; DAF, derived allele frequency; MAF, minor allele frequency.
